# Supplementary material
Source: publisher site journal article supplement (https://www.dovepress.com/article/424918)
Supplement: Supplementary file 1 [file get_supplementary_file.php]

## **Supplementary Materials**

### **Supplementary Tables**

Supplementary Table S1. Hazard Rates and Hazard Ratios of Colorectal Cancer Death by Ever-screened and Never-screened Patients.

Supplementary Table S2. Adjusted Hazard Ratios of the Screening History Using Different Colorectal Cancer Staging Systems.

Supplementary Table S3. Hazard Rates and Hazard Ratios for Colorectal Cancer Death in Different Categories of Time to Diagnosis from the Last Fecal Immunochemical Testing among the Ever-screened Patients.

Supplementary Table S4. Comparison of the Effect of Correction for Competing Risk, Lead-time Bias, and Length Bias.

Supplementary Table S5. Sensitivity Analysis for Length Bias Correction Providing Relative Risk and Approximate Relative Hazard of Those FIT-positive without a Follow-up Examination Compared to Those FIT-positive with a Follow-up Examination.

Supplementary Table S6. Sensitivity Analysis for Length Bias Correction Providing Relative Risk and Approximate Relative Hazard of Those FIT-negative Compared to Those FIT-positive with a Follow-up Examination.

Supplementary Table S7. Sensitivity Analysis for Length Bias Correction Providing Relative Risk and Approximate Relative Hazard of Never-screened Compared to Those FIT-Positive with a Follow-up Examination.

Supplementary Table S8. Hazard Rates and Cox Regression Model Adjustment for Clinicopathological Variables.

Supplementary Table S9. Adjusted Hazard Ratios of the Screening History for Deaths due to Colorectal Cancer (CRC) and Other Causes (Non-CRC).

Supplementary Table S10. Hazard Rates and Hazard Ratios of Colorectal Cancer Death by Screen-detected, Interval Cancer and Never-screened Patients.

Supplementary Table S11. Comparison of the Hazard Ratios of the Lead-time Bias Corrected Model with Original Model Using within 12 Months to Diagnosis as a Reference for FIT-positive Patients with a Follow-up Examination.

## **Supplementary Figures**

Supplementary Figure S1. Survival of Ever-screened and Never-screened Colorectal Cancer Patients.

Supplementary Figure S2. Survival of Ever-screened and Never-screened Colorectal Cancer Patients, Before  
and After Correction for Lead-time Bias.

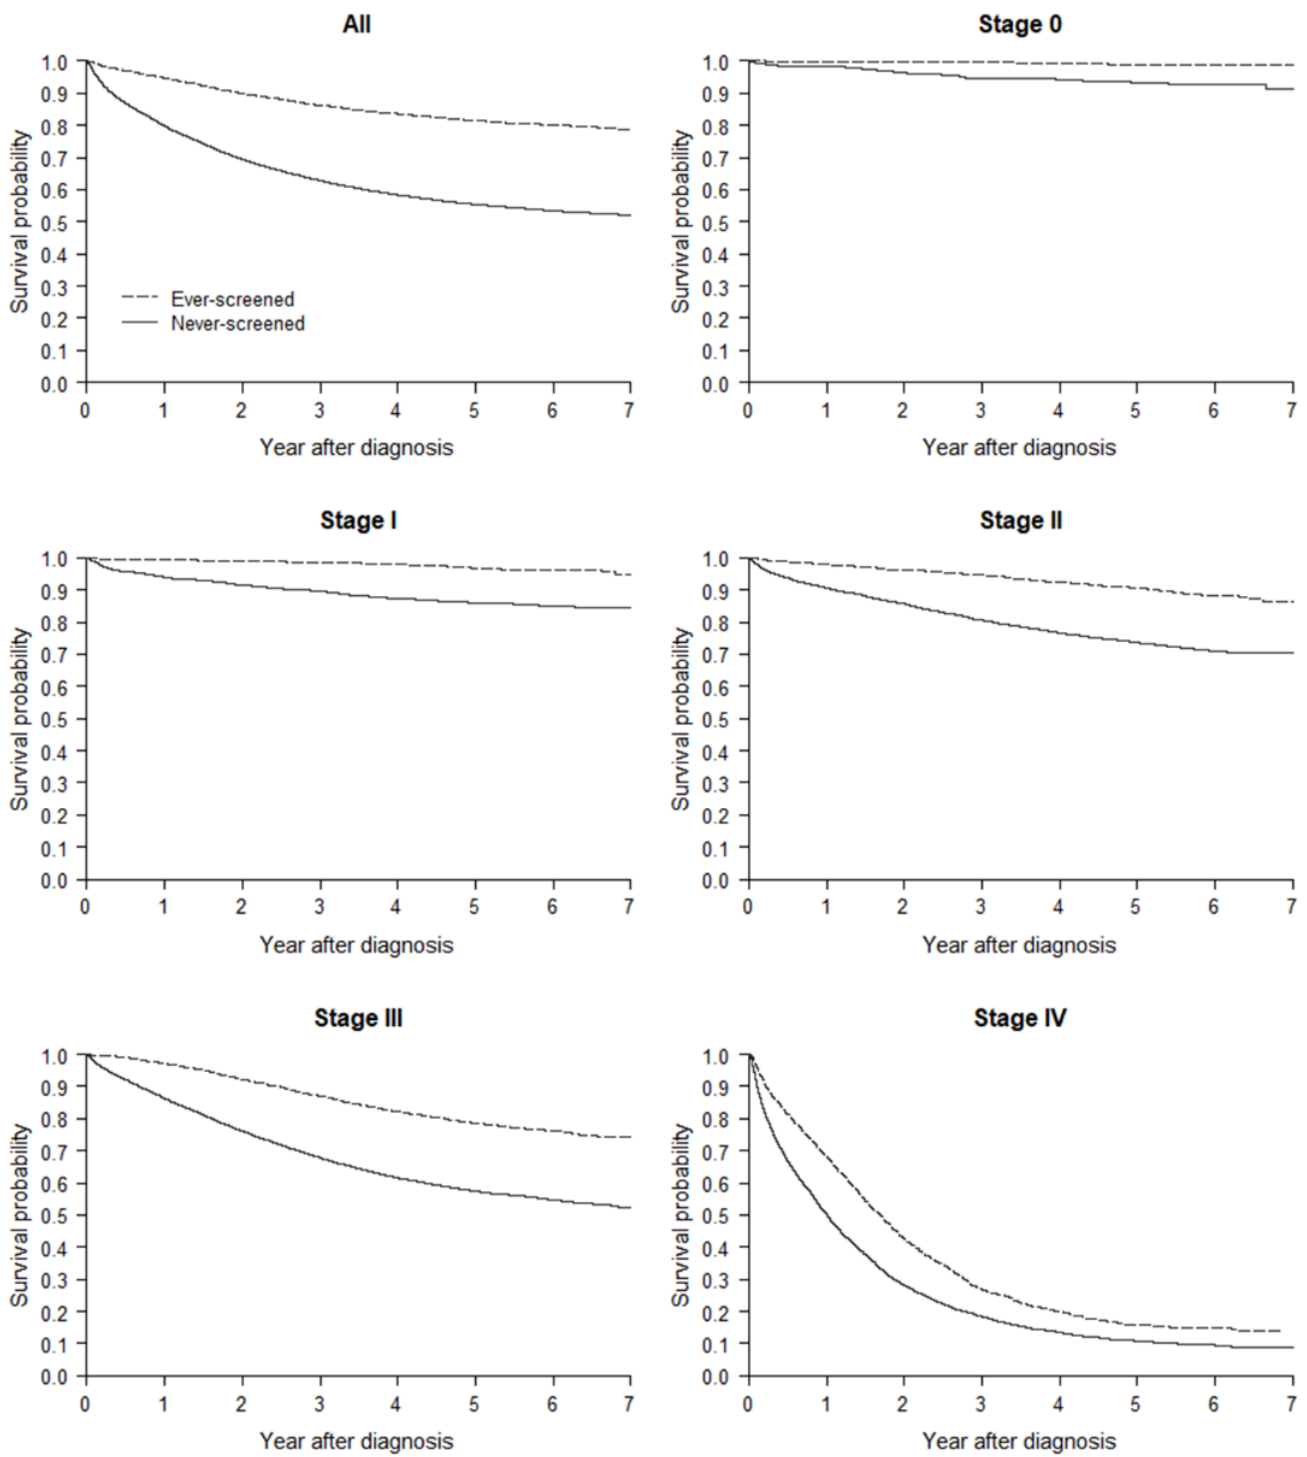

**Supplementary Figure S1.** Survival of Ever-screened and Never-screened Colorectal Cancer Patients.

**Supplementary Table S1.** Hazard Rates and Hazard Ratios of Colorectal Cancer Death by Ever-screened and Never-screened Patients.

| Screening history      | Number of Patients (%) | Person-years | Number of death | Hazard rates, per 100 person-years | Crude hazard ratio (95%CI) <sup>a</sup> | Adjusted hazard ratio (95%CI) <sup>b</sup> |
|------------------------|------------------------|--------------|-----------------|------------------------------------|-----------------------------------------|--------------------------------------------|
| All <sup>a</sup>       |                        |              |                 |                                    |                                         |                                            |
| Never-screened         | 18540 (57.8)           | 60562.0      | 7699            | 12.7                               | 1.00 (Reference)                        | 1.00 (Reference)                           |
| Ever-screened          | 13559 (42.2)           | 62270.3      | 2491            | 4.0                                | 0.34 (0.32 – 0.35)                      | 0.68 (0.65 – 0.72)                         |
| Stage 0 <sup>b</sup>   |                        |              |                 |                                    |                                         |                                            |
| Never-screened         | 1044 (31.4)            | 4598.8       | 63              | 1.4                                | 1.00 (Reference)                        | 1.00 (Reference)                           |
| Ever-screened          | 2279 (68.6)            | 11816.4      | 24              | 0.2                                | 0.15 (0.09 – 0.24)                      | 0.28 (0.15 – 0.54)                         |
| Stage I <sup>b</sup>   |                        |              |                 |                                    |                                         |                                            |
| Never-screened         | 2524 (40.2)            | 10799.1      | 327             | 3.0                                | 1.00 (Reference)                        | 1.00 (Reference)                           |
| Ever-screened          | 3755 (59.8)            | 19404.9      | 125             | 0.6                                | 0.22 (0.18 – 0.27)                      | 0.54 (0.40 – 0.72)                         |
| Stage II <sup>b</sup>  |                        |              |                 |                                    |                                         |                                            |
| Never-screened         | 4498 (65.9)            | 18109.5      | 1120            | 6.2                                | 1.00 (Reference)                        | 1.00 (Reference)                           |
| Ever-screened          | 2326 (34.1)            | 11417.4      | 233             | 2.0                                | 0.34 (0.29 – 0.39)                      | 0.58 (0.49 – 0.69)                         |
| Stage III <sup>b</sup> |                        |              |                 |                                    |                                         |                                            |
| Never-screened         | 5655 (61.8)            | 20137.8      | 2257            | 11.2                               | 1.00 (Reference)                        | 1.00 (Reference)                           |
| Ever-screened          | 3490 (38.2)            | 16129.5      | 746             | 4.6                                | 0.42 (0.39 – 0.46)                      | 0.60 (0.55 – 0.67)                         |
| Stage IV <sup>b</sup>  |                        |              |                 |                                    |                                         |                                            |
| Never-screened         | 4819 (73.8)            | 6916.8       | 3932            | 56.8                               | 1.00 (Reference)                        | 1.00 (Reference)                           |
| Ever-screened          | 1709 (26.2)            | 3502.1       | 1363            | 38.9                               | 0.71 (0.67 – 0.75)                      | 0.85 (0.79 – 0.91)                         |

Abbreviations: AJCC, The American Joint Committee on Cancer

<sup>a</sup> Adjusted for colorectal cancer AJCC stage (0, I, II, III, and IV), colorectal cancer site, hospital levels, treatment, age at diagnosis, sex, and urbanization levels in the multiple Cox regression

<sup>b</sup> Adjusted for colorectal cancer site, hospital for diagnosis, treatment, age at diagnosis, sex, and urbanization levels in the multiple Cox regression

**Supplementary Table S2.** Adjusted Hazard Ratios of the Screening History Using Different Colorectal Cancer Staging Systems.

| Screening history               | Adjusted hazard ratio (95%CI) <sup>a</sup> using |                    |                   |
|---------------------------------|--------------------------------------------------|--------------------|-------------------|
|                                 | AJCC<br>(including substages) <sup>b</sup>       | Dukes <sup>b</sup> | SEER <sup>b</sup> |
| FIT-positive                    |                                                  |                    |                   |
| With a follow-up examination    | 1.00 (Reference)                                 | 1.00 (Reference)   | 1.00 (Reference)  |
| Without a follow-up examination | 1.34 (1.21–1.49)                                 | 1.41 (1.27–1.56)   | 1.45 (1.30–1.61)  |
| FIT-negative                    | 1.57 (1.43–1.72)                                 | 1.63 (1.49–1.79)   | 1.65 (1.50–1.81)  |
| Never-screened                  | 1.66 (1.55–1.77)                                 | 1.77 (1.66–1.90)   | 1.84 (1.72–1.97)  |

Abbreviations: FIT, fecal immunochemical test; AJCC, The American Joint Committee on Cancer; SEER, The Surveillance, Epidemiology and End Results

<sup>a</sup> Adjusted for colorectal cancer stage, colorectal cancer site, hospital levels, treatment, age at diagnosis, sex, and urbanization levels in the multiple Cox regression

<sup>b</sup> AJCC substages (stage 0, I, II-A, II-B, II-C, III-A, III-B, III-C, IV-A, IV-B, and IV-C), Dukes' stage (A, B, C, and D), and SEER stage (localized, regional, and distant)

**Supplementary Table S3.** Hazard Rates and Hazard Ratios for Colorectal Cancer Death in Different Categories of Time to Diagnosis from the Last Fecal Immunochemical Testing among the Ever-screened Patients.

| Time to diagnosis from the last FIT           | Number of patients (%) | Person-years | Number of death | Hazard rates, per 100 person-years | Crude hazard ratio (95%CI) <sup>a</sup> | Adjusted hazard ratio (95%CI) <sup>b</sup> |
|-----------------------------------------------|------------------------|--------------|-----------------|------------------------------------|-----------------------------------------|--------------------------------------------|
| FIT-positive, with a follow-up examination    |                        |              |                 |                                    |                                         |                                            |
| ≤ 3 months                                    | 6898 (21.5)            | 33726.4      | 918             | 2.7                                | 1.00 (Reference)                        | 1.00 (Reference)                           |
| 3-6 months                                    | 734 (2.3)              | 3529.3       | 86              | 2.4                                | 0.89 (0.71–1.11)                        | 1.03 (0.83–1.29)                           |
| 6-12 months                                   | 410 (1.3)              | 1894.8       | 62              | 3.3                                | 1.18 (0.91–1.53)                        | 0.95 (0.73–1.23)                           |
| > 12 months                                   | 755 (2.4)              | 3340.0       | 155             | 4.6                                | 1.66 (1.40–1.97)                        | 1.31 (1.10–1.55)                           |
| FIT-positive, without a follow-up examination |                        |              |                 |                                    |                                         |                                            |
| ≤ 3 months                                    | 421 (1.3)              | 1873.2       | 94              | 5.0                                | 1.82 (1.48–2.26)                        | 1.44 (1.16–1.78)                           |
| 3-6 months                                    | 176 (0.6)              | 730.6        | 49              | 6.7                                | 2.37 (1.78–3.16)                        | 1.52 (1.14–2.03)                           |
| 6-12 months                                   | 307 (1.0)              | 1329.0       | 71              | 5.3                                | 1.91 (1.50–2.43)                        | 1.28 (1.00–1.63)                           |
| > 12 months                                   | 922 (2.9)              | 3591.8       | 291             | 8.1                                | 2.79 (2.44–3.18)                        | 1.48 (1.30–1.69)                           |
| FIT-negative                                  |                        |              |                 |                                    |                                         |                                            |
| ≤ 3 months                                    | 237 (0.7)              | 905.9        | 82              | 9.1                                | 3.16 (2.52–3.96)                        | 2.29 (1.82–2.87)                           |
| 3-6 months                                    | 168 (0.5)              | 736.9        | 34              | 4.6                                | 1.65 (1.18–2.33)                        | 1.57 (1.12–2.22)                           |
| 6-12 months                                   | 353 (1.1)              | 1471.5       | 100             | 6.8                                | 2.40 (1.96–2.95)                        | 1.84 (1.50–2.26)                           |
| > 12 months                                   | 2178 (6.8)             | 9140.9       | 549             | 6.0                                | 2.12 (1.90–2.35)                        | 1.59 (1.43–1.77)                           |
| Never-screened                                | 18540 (57.8)           | 60562.0      | 7699            | 12.7                               | 4.27 (3.99–4.58)                        | 1.82 (1.69–1.96)                           |

Abbreviations: FIT, fecal immunochemical test; AJCC, The American Joint Committee on Cancer

<sup>a</sup> Simple Cox regression model

<sup>b</sup> Adjusted for colorectal cancer AJCC stage (0, I, II, III, and IV), colorectal cancer site, hospital levels, treatment, age at diagnosis, sex, and urbanization levels in the multiple Cox regression model

**Supplementary Table S4.** Comparison of the Effect of Correction for Competing Risk, Lead-time Bias, and Length Bias.

| <b>Models</b>                                          | <b>Crude hazard ratio (95%CI)<sup>a</sup></b> | <b>Adjusted hazard ratio (95%CI)<sup>b</sup></b> |
|--------------------------------------------------------|-----------------------------------------------|--------------------------------------------------|
| <b>Model 1 (Cox hazards model)</b>                     |                                               |                                                  |
| FIT-positive                                           |                                               |                                                  |
| With a follow-up examination                           | 1.00 (Reference)                              | 1.00 (Reference)                                 |
| Without a follow-up examination                        | 2.24 (2.02 – 2.49)                            | 1.40 (1.26 – 1.56)                               |
| FIT-negative                                           |                                               |                                                  |
| Never-screened                                         | 4.06 (3.82 – 4.31)                            | 1.76 (1.65 – 1.89)                               |
| <b>Model 2 (Fine-Gray model)</b>                       |                                               |                                                  |
| FIT-positive                                           |                                               |                                                  |
| With a follow-up examination                           | 1.00 (Reference)                              | 1.00 (Reference)                                 |
| Without a follow-up examination                        | 2.19 (1.98 – 2.43)                            | 1.38 (1.25 – 1.52)                               |
| FIT-negative                                           |                                               |                                                  |
| Never-screened                                         | 3.70 (3.48 – 3.92)                            | 1.69 (1.58 – 1.80)                               |
| <b>Model 3 (lead-time bias corrected from model 1)</b> |                                               |                                                  |
| FIT-positive                                           |                                               |                                                  |
| With a follow-up examination                           | 1.00 (Reference)                              | 1.00 (Reference)                                 |
| Without a follow-up examination                        | 1.71 (1.54 – 1.89)                            | 1.10 (0.98 – 1.21)                               |
| FIT-negative                                           |                                               |                                                  |
| Never-screened                                         | 3.08 (2.90 – 3.27)                            | 1.37 (1.28 – 1.47)                               |
| <b>Model 4 (length bias corrected from model 1)</b>    |                                               |                                                  |
| FIT-positive                                           |                                               |                                                  |
| With a follow-up examination                           | 1.00 (Reference)                              |                                                  |
| Without a follow-up examination                        | 1.87 (1.18 – 2.15) <sup>c</sup>               |                                                  |
| FIT-negative                                           |                                               |                                                  |
| Never-screened                                         | 3.53 (3.15 – 3.62) <sup>c</sup>               |                                                  |

Abbreviations: AJCC, The American Joint Committee on Cancer; FIT, fecal immunochemical test

<sup>a</sup> Simple Cox regression model

<sup>b</sup> Adjusted for colorectal cancer AJCC stage, colorectal cancer site, hospital levels, treatment, age at diagnosis, sex, and urbanization levels in the multiple Cox regression model

<sup>c</sup> Model for approximate relative hazard for length bias correction, absolute value range provided from sensitivity analysis instead of 95% confidence intervals (correspond to Supplementary Table 7 to Table 9)



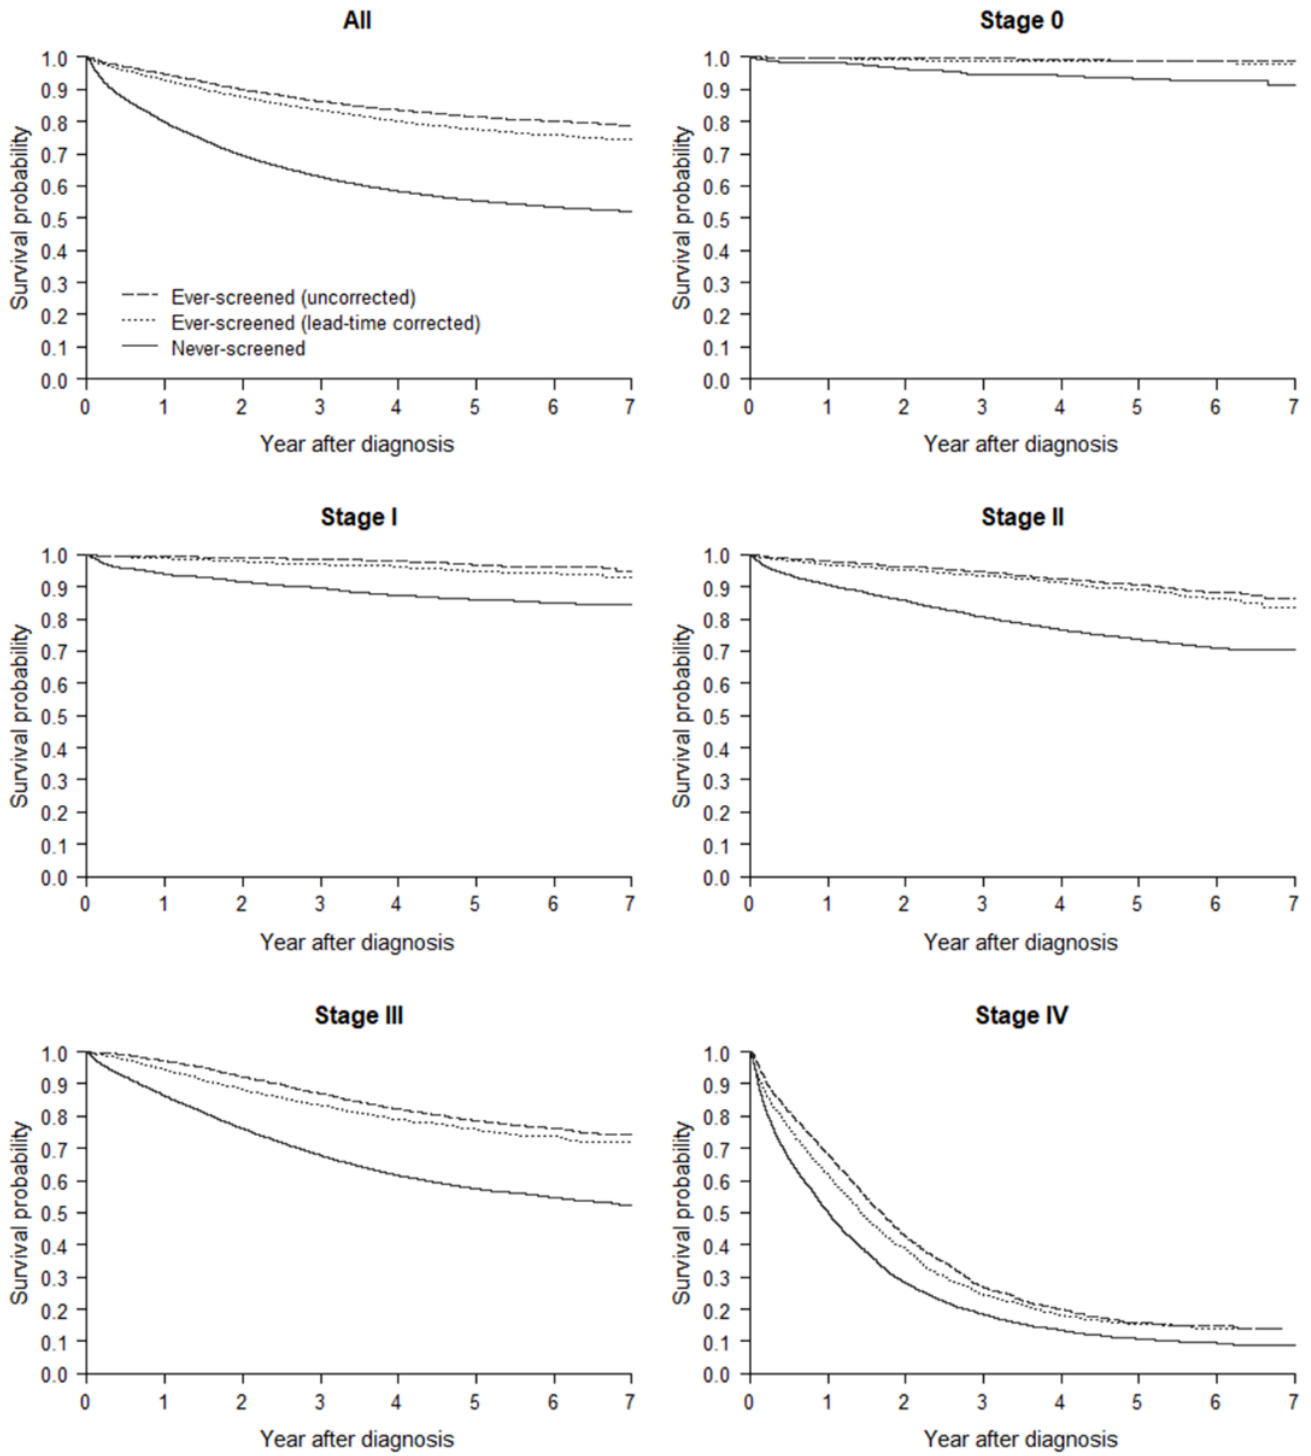

**Supplementary Figure S2.** Survival of Ever-screened and Never-screened Colorectal Cancer Patients, Before and After Correction for Lead-time Bias.

**Supplementary Table S5.** Sensitivity Analysis for Length Bias Correction Providing Relative Risk and Approximate Relative Hazard of Those FIT-positive without a Follow-up Examination Compared to Those FIT-positive with a Follow-up Examination.

| Relative screen detection and fatality rate | Mixing fraction | Screen detection probability | Symptomatic tumor fatality rate | True relative risk <sup>a</sup> | Approximate relative hazard <sup>b</sup> |
|---------------------------------------------|-----------------|------------------------------|---------------------------------|---------------------------------|------------------------------------------|
| 0.90                                        | 0.90            | 0.82                         | 0.28                            | 1.98                            | 2.15                                     |
| 0.90                                        | 0.80            | 0.81                         | 0.28                            | 1.97                            | 2.15                                     |
| 0.90                                        | 0.70            | 0.80                         | 0.28                            | 1.97                            | 2.14                                     |
| 0.90                                        | 0.60            | 0.79                         | 0.28                            | 1.96                            | 2.14                                     |
| 0.90                                        | 0.50            | 0.78                         | 0.29                            | 1.96                            | 2.14                                     |
| 0.80                                        | 0.90            | 0.81                         | 0.28                            | 1.94                            | 2.11                                     |
| 0.80                                        | 0.80            | 0.79                         | 0.28                            | 1.90                            | 2.06                                     |
| 0.80                                        | 0.70            | 0.77                         | 0.28                            | 1.88                            | 2.03                                     |
| 0.80                                        | 0.60            | 0.75                         | 0.28                            | 1.86                            | 2.02                                     |
| 0.80                                        | 0.50            | 0.74                         | 0.29                            | 1.86                            | 2.02                                     |
| 0.70                                        | 0.90            | 0.79                         | 0.27                            | 1.87                            | 2.01                                     |
| 0.70                                        | 0.80            | 0.76                         | 0.27                            | 1.78                            | 1.91                                     |
| 0.70                                        | 0.70            | 0.73                         | 0.27                            | 1.72                            | 1.85                                     |
| 0.70                                        | 0.60            | 0.71                         | 0.27                            | 1.69                            | 1.81                                     |
| 0.70                                        | 0.50            | 0.68                         | 0.28                            | 1.68                            | 1.80                                     |
| 0.60                                        | 0.90            | 0.78                         | 0.26                            | 1.75                            | 1.87                                     |
| 0.60                                        | 0.80            | 0.73                         | 0.25                            | 1.60                            | 1.69                                     |
| 0.60                                        | 0.70            | 0.69                         | 0.25                            | 1.50                            | 1.58                                     |
| 0.60                                        | 0.60            | 0.65                         | 0.26                            | 1.45                            | 1.52                                     |
| 0.60                                        | 0.50            | 0.62                         | 0.27                            | 1.44                            | 1.51                                     |
| 0.50                                        | 0.90            | 0.75                         | 0.24                            | 1.58                            | 1.67                                     |
| 0.50                                        | 0.80            | 0.69                         | 0.23                            | 1.36                            | 1.41                                     |
| 0.50                                        | 0.70            | 0.64                         | 0.22                            | 1.24                            | 1.27                                     |
| 0.50                                        | 0.60            | 0.59                         | 0.23                            | 1.17                            | 1.20                                     |
| 0.50                                        | 0.50            | 0.55                         | 0.24                            | 1.15                            | 1.18                                     |

<sup>a</sup> True relative risk (median, range): 1.75 (1.15 - 1.98)

<sup>b</sup> Approximate relative hazard (median, range): 1.87 (1.18 - 2.15)

**Supplementary Table S6.** Sensitivity Analysis for Length Bias Correction Providing Relative Risk and Approximate Relative Hazard of Those FIT-negative Compared to Those FIT-positive with a Follow-up Examination.

| Relative screen detection and fatality rate | Mixing fraction | Screen detection probability | Symptomatic tumor fatality rate | True relative risk <sup>a</sup> | Approximate relative hazard <sup>b</sup> |
|---------------------------------------------|-----------------|------------------------------|---------------------------------|---------------------------------|------------------------------------------|
| 0.90                                        | 0.90            | 0.74                         | 0.26                            | 1.87                            | 2.01                                     |
| 0.90                                        | 0.80            | 0.73                         | 0.26                            | 1.86                            | 2.01                                     |
| 0.90                                        | 0.70            | 0.73                         | 0.27                            | 1.86                            | 2.00                                     |
| 0.90                                        | 0.60            | 0.72                         | 0.27                            | 1.86                            | 2.00                                     |
| 0.90                                        | 0.50            | 0.71                         | 0.27                            | 1.86                            | 2.00                                     |
| 0.80                                        | 0.90            | 0.73                         | 0.26                            | 1.84                            | 1.98                                     |
| 0.80                                        | 0.80            | 0.71                         | 0.27                            | 1.82                            | 1.96                                     |
| 0.80                                        | 0.70            | 0.70                         | 0.27                            | 1.80                            | 1.94                                     |
| 0.80                                        | 0.60            | 0.68                         | 0.27                            | 1.79                            | 1.93                                     |
| 0.80                                        | 0.50            | 0.67                         | 0.28                            | 1.79                            | 1.93                                     |
| 0.70                                        | 0.90            | 0.72                         | 0.26                            | 1.79                            | 1.92                                     |
| 0.70                                        | 0.80            | 0.69                         | 0.26                            | 1.73                            | 1.86                                     |
| 0.70                                        | 0.70            | 0.66                         | 0.27                            | 1.69                            | 1.81                                     |
| 0.70                                        | 0.60            | 0.64                         | 0.27                            | 1.67                            | 1.79                                     |
| 0.70                                        | 0.50            | 0.62                         | 0.28                            | 1.66                            | 1.78                                     |
| 0.60                                        | 0.90            | 0.70                         | 0.25                            | 1.71                            | 1.83                                     |
| 0.60                                        | 0.80            | 0.66                         | 0.25                            | 1.60                            | 1.70                                     |
| 0.60                                        | 0.70            | 0.62                         | 0.26                            | 1.53                            | 1.62                                     |
| 0.60                                        | 0.60            | 0.59                         | 0.26                            | 1.49                            | 1.58                                     |
| 0.60                                        | 0.50            | 0.56                         | 0.27                            | 1.48                            | 1.57                                     |
| 0.50                                        | 0.90            | 0.68                         | 0.24                            | 1.59                            | 1.68                                     |
| 0.50                                        | 0.80            | 0.62                         | 0.24                            | 1.42                            | 1.48                                     |
| 0.50                                        | 0.70            | 0.58                         | 0.24                            | 1.32                            | 1.37                                     |
| 0.50                                        | 0.60            | 0.54                         | 0.25                            | 1.27                            | 1.31                                     |
| 0.50                                        | 0.50            | 0.50                         | 0.26                            | 1.25                            | 1.29                                     |

<sup>a</sup> True relative risk (median, range): 1.71 (1.25 - 1.87)

<sup>b</sup> Approximate relative hazard (median, range): 1.83 (1.29 - 2.01)

**Supplementary Table S7.** Sensitivity Analysis for Length Bias Correction Providing Relative Risk and Approximate Relative Hazard of Never-screened Compared to Those FIT-Positive with a Follow-up Examination.

| Relative screen detection and fatality rate | Mixing fraction | Screen detection probability | Symptomatic tumor fatality rate | True relative risk <sup>a</sup> | Approximate relative hazard <sup>b</sup> |
|---------------------------------------------|-----------------|------------------------------|---------------------------------|---------------------------------|------------------------------------------|
| 0.90                                        | 0.90            | 0.32                         | 0.42                            | 2.99                            | 3.59                                     |
| 0.90                                        | 0.80            | 0.31                         | 0.42                            | 2.98                            | 3.60                                     |
| 0.90                                        | 0.70            | 0.31                         | 0.43                            | 2.98                            | 3.60                                     |
| 0.90                                        | 0.60            | 0.31                         | 0.43                            | 2.98                            | 3.61                                     |
| 0.90                                        | 0.50            | 0.30                         | 0.44                            | 2.98                            | 3.62                                     |
| 0.80                                        | 0.90            | 0.31                         | 0.42                            | 2.97                            | 3.58                                     |
| 0.80                                        | 0.80            | 0.31                         | 0.43                            | 2.96                            | 3.58                                     |
| 0.80                                        | 0.70            | 0.30                         | 0.44                            | 2.95                            | 3.58                                     |
| 0.80                                        | 0.60            | 0.29                         | 0.45                            | 2.94                            | 3.60                                     |
| 0.80                                        | 0.50            | 0.29                         | 0.46                            | 2.94                            | 3.62                                     |
| 0.70                                        | 0.90            | 0.31                         | 0.43                            | 2.94                            | 3.55                                     |
| 0.70                                        | 0.80            | 0.30                         | 0.44                            | 2.90                            | 3.52                                     |
| 0.70                                        | 0.70            | 0.29                         | 0.45                            | 2.88                            | 3.52                                     |
| 0.70                                        | 0.60            | 0.27                         | 0.47                            | 2.86                            | 3.53                                     |
| 0.70                                        | 0.50            | 0.27                         | 0.48                            | 2.86                            | 3.56                                     |
| 0.60                                        | 0.90            | 0.30                         | 0.43                            | 2.89                            | 3.48                                     |
| 0.60                                        | 0.80            | 0.28                         | 0.44                            | 2.81                            | 3.42                                     |
| 0.60                                        | 0.70            | 0.27                         | 0.46                            | 2.76                            | 3.39                                     |
| 0.60                                        | 0.60            | 0.25                         | 0.48                            | 2.73                            | 3.39                                     |
| 0.60                                        | 0.50            | 0.24                         | 0.50                            | 2.72                            | 3.43                                     |
| 0.50                                        | 0.90            | 0.29                         | 0.43                            | 2.81                            | 3.38                                     |
| 0.50                                        | 0.80            | 0.27                         | 0.45                            | 2.68                            | 3.24                                     |
| 0.50                                        | 0.70            | 0.25                         | 0.47                            | 2.59                            | 3.17                                     |
| 0.50                                        | 0.60            | 0.23                         | 0.49                            | 2.54                            | 3.15                                     |
| 0.50                                        | 0.50            | 0.21                         | 0.53                            | 2.53                            | 3.20                                     |

<sup>a</sup> True relative risk (median, range): 2.89 (2.53 - 2.99)

<sup>b</sup> Approximate relative hazard (median, range): 3.53 (3.15 - 3.62)

**Supplementary Table S8.** Hazard Rates and Cox Regression Model Adjustment for Clinicopathological Variables.

| Variables                                   | Number of patients (%) | Person-years | Number of death | Hazard rates (per 100 person-years) | Crude hazard ratio (95%CI) <sup>a</sup> | Adjusted hazard ratio (95%CI) <sup>b</sup> |
|---------------------------------------------|------------------------|--------------|-----------------|-------------------------------------|-----------------------------------------|--------------------------------------------|
| Screening history                           |                        |              |                 |                                     |                                         |                                            |
| FIT-positive                                |                        |              |                 |                                     |                                         |                                            |
| With a follow-up examination                | 8797 (27.4)            | 42490.4      | 1221            | 2.9                                 | 1.00 (Reference)                        | 1.00 (Reference)                           |
| Without a follow-up examination             | 1826 (5.7)             | 7524.6       | 505             | 6.7                                 | 2.24 (2.02 – 2.49)                      | 1.10 (0.94 – 1.29)                         |
| FIT-negative                                |                        |              |                 |                                     |                                         |                                            |
| Never-screened                              | 18540 (57.8)           | 60562.0      | 7699            | 12.7                                | 4.06 (3.82 – 4.31)                      | 1.39 (1.26 – 1.54)                         |
| Colorectal cancer stage (AJCC) <sup>c</sup> |                        |              |                 |                                     |                                         |                                            |
| 0                                           | 3323 (10.4)            | 16415.1      | 87              | 0.5                                 | 1.00 (Reference)                        | 1.00 (Reference)                           |
| I                                           | 6279 (19.6)            | 30203.9      | 452             | 1.5                                 | 2.82 (2.24 – 3.55)                      | 1.86 (0.82 – 4.22)                         |
| II                                          | 6824 (21.3)            | 29526.9      | 1353            | 4.6                                 | 8.49 (6.83 – 10.54)                     | 6.36 (2.83 – 14.27)                        |
| III                                         | 9145 (28.5)            | 36267.4      | 3003            | 8.3                                 | 15.08 (12.18 – 18.66)                   | 12.65 (5.64 – 28.40)                       |
| IV                                          | 6528 (20.3)            | 10418.9      | 5295            | 50.8                                | 79.40 (64.22 – 98.18)                   | 46.10 (20.50 – 103.63)                     |
| Grade                                       |                        |              |                 |                                     |                                         |                                            |
| 1                                           | 2666 (10.1)            | 12123.4      | 378             | 3.1                                 | 1.00 (Reference)                        | 1.00 (Reference)                           |
| 2                                           | 21316 (80.5)           | 84928.2      | 6430            | 7.6                                 | 2.35 (2.12 – 2.61)                      | 1.23 (1.05 – 1.44)                         |
| 3                                           | 2262 (8.5)             | 6449.6       | 1170            | 18.1                                | 5.32 (4.74 – 5.97)                      | 1.54 (1.29 – 1.85)                         |
| 4                                           | 250 (0.9)              | 829.4        | 108             | 13.0                                | 3.92 (3.17 – 4.86)                      | 1.36 (1.02 – 1.82)                         |
| Tumor size (mm)                             |                        |              |                 |                                     |                                         |                                            |
| 1 - 50                                      | 19005 (70.8)           | 78914.6      | 4920            | 6.2                                 | 1.00 (Reference)                        |                                            |
| 51 - 100                                    | 7342 (27.3)            | 24741.7      | 3129            | 12.6                                | 1.95 (1.86 – 2.04)                      |                                            |
| 101+                                        | 509 (1.9)              | 1497.2       | 252             | 16.8                                | 2.55 (2.25 – 2.90)                      |                                            |
| Tumor size (continuous) (per mm)            |                        |              |                 |                                     | 1.02 (1.02 – 1.02)                      | 1.00 (1.00 – 1.01)                         |
| Lymph node ratio                            |                        |              |                 |                                     |                                         |                                            |
| 0 - 0.24                                    | 19439 (85.4)           | 85939.6      | 4138            | 4.8                                 | 1.00 (Reference)                        |                                            |
| 0.25+                                       | 3332 (14.6)            | 9419.5       | 2045            | 21.7                                | 4.25 (4.03 – 4.48)                      |                                            |
| Lymph node ratio (continuous)               |                        |              |                 |                                     | 21.25 (19.47 – 23.19)                   | 4.28 (3.73 – 4.90)                         |
| Circumferential resection margin (mm)       |                        |              |                 |                                     |                                         |                                            |
| <0.1                                        | 1249 (7.0)             | 3413.7       | 767             | 22.5                                | 1.00 (Reference)                        |                                            |
| 0.1 - 0.9                                   | 4826 (26.9)            | 20396.7      | 1199            | 5.9                                 | 0.27 (0.25 – 0.30)                      |                                            |
| 1.0 - 1.9                                   | 784 (4.4)              | 2951.1       | 305             | 10.3                                | 0.48 (0.42 – 0.55)                      |                                            |
| 2.0 - 2.9                                   | 631 (3.5)              | 2486.2       | 215             | 8.6                                 | 0.40 (0.35 – 0.47)                      |                                            |
| 3.0 - 3.9                                   | 612 (3.4)              | 2513.0       | 197             | 7.8                                 | 0.37 (0.32 – 0.43)                      |                                            |
| 4.0 - 4.9                                   | 329 (1.8)              | 1414.7       | 94              | 6.6                                 | 0.31 (0.25 – 0.39)                      |                                            |

|                                               |              |          |      |      |                  |                  |
|-----------------------------------------------|--------------|----------|------|------|------------------|------------------|
| 5.0+                                          | 9532 (53.1)  | 42458.9  | 1993 | 4.7  | 0.22 (0.20–0.24) |                  |
| Circumferential resection margin (per 0.1 mm) |              |          |      |      | 1.00 (1.00–1.00) | 1.00 (1.00–1.00) |
| Perineural invasion                           |              |          |      |      |                  |                  |
| Without                                       | 16055 (71.1) | 71852.4  | 3019 | 4.2  | 1.00 (Reference) | 1.00 (Reference) |
| With                                          | 6523 (28.9)  | 22889.3  | 3002 | 13.1 | 3.00 (2.85–3.16) | 1.44 (1.35–1.53) |
| Obstruction                                   |              |          |      |      |                  |                  |
| Without                                       | 21144 (71.0) | 90272.8  | 4873 | 5.4  | 1.00 (Reference) | 1.00 (Reference) |
| With                                          | 8618 (29.0)  | 26114.3  | 4293 | 16.4 | 2.81 (2.69–2.93) | 1.33 (1.25–1.42) |
| Perforation                                   |              |          |      |      |                  |                  |
| Without                                       | 28748 (96.7) | 113814.5 | 8553 | 7.5  | 1.00 (Reference) | 1.00 (Reference) |
| With                                          | 985 (3.3)    | 2563.2   | 585  | 22.8 | 2.78 (2.55–3.02) | 1.86 (1.67–2.08) |
| Chemotherapy                                  |              |          |      |      |                  |                  |
| Without (other therapies)                     | 14539 (45.3) | 60014.5  | 2850 | 4.7  | 1.00 (Reference) | 1.00 (Reference) |
| With                                          | 15966 (49.7) | 60197.1  | 6416 | 10.7 | 2.13 (2.04–2.23) | 0.48 (0.44–0.51) |
| No therapy                                    | 1594 (5.0)   | 2620.6   | 924  | 35.3 | 6.12 (5.68–6.59) | 1.03 (0.26–4.15) |

Abbreviations: AJCC, The American Joint Committee on Cancer; FIT, fecal immunochemical test

Note: All these variables related to the patient were investigated at the time of colorectal cancer diagnosis.

<sup>a</sup> Simple Cox regression model

<sup>b</sup> Additionally adjusted for colorectal cancer AJCC stage (0, I, II, III, and IV), colorectal cancer site, hospital levels, age at diagnosis, sex, and urbanization levels in the multiple Cox regression

**Supplementary Table S9.** Adjusted Hazard Ratios of the Screening History for Deaths due to Colorectal Cancer (CRC) and Other Causes (Non-CRC).

| Screening history               | Adjusted hazard ratio (95%CI) for |                  |
|---------------------------------|-----------------------------------|------------------|
|                                 | CRC                               | Non-CRC          |
| All <sup>a</sup>                |                                   |                  |
| FIT-positive                    |                                   |                  |
| With a follow-up examination    | 1.00 (Reference)                  | 1.00 (Reference) |
| Without a follow-up examination | 1.40 (1.26–1.56)                  | 1.38 (1.16–1.63) |
| FIT-negative                    | 1.63 (1.48–1.78)                  | 1.28 (1.10–1.49) |
| Never-screened                  | 1.76 (1.65–1.89)                  | 1.68 (1.51–1.87) |
| Stage 0 <sup>b</sup>            |                                   |                  |
| FIT-positive                    |                                   |                  |
| With a follow-up examination    | 1.00 (Reference)                  | 1.00 (Reference) |
| Without a follow-up examination | 1.48 (0.43–5.06)                  | 0.97 (0.58–1.63) |
| FIT-negative                    | 0.87 (0.29–2.62)                  | 0.96 (0.67–1.38) |
| Never-screened                  | 3.62 (1.79–7.30)                  | 1.81 (1.36–2.41) |
| Stage I <sup>b</sup>            |                                   |                  |
| FIT-positive                    |                                   |                  |
| With a follow-up examination    | 1.00 (Reference)                  | 1.00 (Reference) |
| Without a follow-up examination | 1.28 (0.72–2.26)                  | 0.96 (0.64–1.45) |
| FIT-negative                    | 1.26 (0.83–1.92)                  | 0.99 (0.73–1.34) |
| Never-screened                  | 1.83 (1.31–2.56)                  | 1.59 (1.28–1.98) |
| Stage II <sup>b</sup>           |                                   |                  |
| FIT-positive                    |                                   |                  |
| With a follow-up examination    | 1.00 (Reference)                  | 1.00 (Reference) |
| Without a follow-up examination | 1.79 (1.29–2.47)                  | 1.48 (1.02–2.15) |
| FIT-negative                    | 1.49 (1.10–2.03)                  | 1.56 (1.11–2.18) |
| Never-screened                  | 2.06 (1.66–2.56)                  | 1.39 (1.09–1.78) |
| Stage III <sup>b</sup>          |                                   |                  |
| FIT-positive                    |                                   |                  |
| With a follow-up examination    | 1.00 (Reference)                  | 1.00 (Reference) |
| Without a follow-up examination | 1.22 (1.00–1.49)                  | 1.86 (1.36–2.54) |
| FIT-negative                    | 1.70 (1.44–2.01)                  | 1.49 (1.08–2.06) |
| Never-screened                  | 1.93 (1.71–2.17)                  | 1.85 (1.49–2.30) |
| Stage IV <sup>b</sup>           |                                   |                  |
| FIT-positive                    |                                   |                  |
| With a follow-up examination    | 1.00 (Reference)                  | 1.00 (Reference) |
| Without a follow-up examination | 1.24 (1.08–1.42)                  | 1.14 (0.71–1.84) |
| FIT-negative                    | 1.40 (1.23–1.58)                  | 1.35 (0.89–2.04) |
| Never-screened                  | 1.36 (1.24–1.50)                  | 1.42 (1.05–1.93) |

Abbreviations: CRC, colorectal cancer; FIT, fecal immunochemical test; AJCC, The American Joint Committee on Cancer

<sup>a</sup> Adjusted for colorectal cancer AJCC stage (0, I, II, III, and IV), colorectal cancer site, hospital levels, treatment, age at diagnosis, sex, and urbanization levels in the multiple Cox regression

<sup>b</sup> Adjusted for colorectal cancer site, hospital for diagnosis, treatment, age at diagnosis, sex, and urbanization levels in the multiple Cox regression

**Supplementary Table S10.** Hazard Rates and Hazard Ratios of Colorectal Cancer Death by Screen-detected, Interval Cancer and Never-screened Patients.

| Screening history               | Number of patients (%) | Person-years | Number of death | Hazard rates, per 100 person-years | Crude hazard ratio (95%CI) <sup>a</sup> | Adjusted hazard ratio (95%CI) <sup>b</sup> |
|---------------------------------|------------------------|--------------|-----------------|------------------------------------|-----------------------------------------|--------------------------------------------|
| All (n=28197) <sup>a</sup>      |                        |              |                 |                                    |                                         |                                            |
| Screen-detected <sup>c</sup>    | 7390 (26.2)            | 36026.4      | 985             | 2.7                                | 1.00 (Reference)                        | 1.00 (Reference)                           |
| Interval cancer <sup>d</sup>    | 2267 (8.0)             | 9645.3       | 585             | 6.1                                | 2.15 (1.94–2.38)                        | 1.71 (1.54–1.90)                           |
| Never-screened                  | 18540 (65.8)           | 60562.0      | 7699            | 12.7                               | 4.25 (3.98–4.54)                        | 1.89 (1.75–2.03)                           |
| Stage 0 (n=2791) <sup>b</sup>   |                        |              |                 |                                    |                                         |                                            |
| Screen-detected <sup>c</sup>    | 1377 (49.3)            | 7196.2       | 11              | 0.2                                | 1.00 (Reference)                        | 1.00 (Reference)                           |
| Interval cancer <sup>d</sup>    | 370 (13.3)             | 1921.2       | 3               | 0.2                                | 1.02 (0.29–3.66)                        | 0.95 (0.26–3.46)                           |
| Never-screened                  | 1044 (37.4)            | 4598.8       | 63              | 1.4                                | 8.82 (4.65–16.73)                       | 4.57 (2.06–10.13)                          |
| Stage I (n=5370) <sup>b</sup>   |                        |              |                 |                                    |                                         |                                            |
| Screen-detected <sup>c</sup>    | 2289 (42.6)            | 11947.8      | 67              | 0.6                                | 1.00 (Reference)                        | 1.00 (Reference)                           |
| Interval cancer <sup>d</sup>    | 557 (10.4)             | 2846.5       | 26              | 0.9                                | 1.62 (1.03–2.55)                        | 1.36 (0.86–2.15)                           |
| Never-screened                  | 2524 (47.0)            | 10799.1      | 327             | 3.0                                | 5.23 (4.02–6.80)                        | 2.13 (1.52–2.99)                           |
| Stage II (n=6081) <sup>b</sup>  |                        |              |                 |                                    |                                         |                                            |
| Screen-detected <sup>c</sup>    | 1226 (20.2)            | 6203.0       | 94              | 1.5                                | 1.00 (Reference)                        | 1.00 (Reference)                           |
| Interval cancer <sup>d</sup>    | 357 (5.9)              | 1761.3       | 42              | 2.4                                | 1.57 (1.09–2.27)                        | 1.41 (0.98–2.03)                           |
| Never-screened                  | 4498(74.0)             | 18109.5      | 1120            | 6.2                                | 3.96 (3.21–4.89)                        | 2.32 (1.84–2.93)                           |
| Stage III (n=8086) <sup>b</sup> |                        |              |                 |                                    |                                         |                                            |
| Screen-detected <sup>c</sup>    | 1880 (23.3)            | 9214.5       | 334             | 3.6                                | 1.00 (Reference)                        | 1.00 (Reference)                           |
| Interval cancer <sup>d</sup>    | 551 (6.8)              | 2377.0       | 163             | 6.9                                | 1.86 (1.54–2.24)                        | 1.83 (1.52–2.21)                           |
| Never-screened                  | 5655 (69.9)            | 20137.8      | 2257            | 11.2                               | 3.00 (2.68–3.37)                        | 2.04 (1.80–2.32)                           |
| Stage IV (n=5869) <sup>b</sup>  |                        |              |                 |                                    |                                         |                                            |
| Screen-detected <sup>c</sup>    | 618 (10.5)             | 1464.9       | 479             | 32.7                               | 1.00 (Reference)                        | 1.00 (Reference)                           |
| Interval cancer <sup>d</sup>    | 432 (7.4)              | 739.3        | 351             | 47.5                               | 1.40 (1.22–1.60)                        | 1.42 (1.24–1.64)                           |
| Never-screened                  | 4819 (82.1)            | 6916.8       | 3932            | 56.8                               | 1.65 (1.50–1.81)                        | 1.38 (1.25–1.53)                           |

Abbreviations: FIT, fecal immunochemical test; AJCC, The American Joint Committee on Cancer

<sup>a</sup> Adjusted for colorectal cancer AJCC stage (0, I, II, III, and IV), colorectal cancer site, hospital levels, treatment, age at diagnosis, sex, and urbanization levels in the multiple Cox regression

<sup>b</sup> Adjusted for colorectal cancer site, hospital for diagnosis, treatment, age at diagnosis, sex, and urbanization levels in the multiple Cox regression

<sup>c</sup> Patients diagnosed through a positive FIT result and a follow-up examination

<sup>d</sup> Patients diagnosed within 2 years following their most recent negative FIT result



**Supplementary Table S11.** Comparison of the Hazard Ratios of the Lead-time Bias Corrected Model with Original Model Using within 12 Months of Time to Diagnosis as a Reference for FIT-positive Patients with a Follow-up Examination.

| <b>Models</b>                                          | <b>Crude hazard ratio (95%CI)<sup>a</sup></b> | <b>Adjusted hazard ratio (95%CI)<sup>b</sup></b> |
|--------------------------------------------------------|-----------------------------------------------|--------------------------------------------------|
| <b>Cox hazards model</b>                               |                                               |                                                  |
| FIT-positive                                           |                                               |                                                  |
| With a follow-up examination                           |                                               |                                                  |
| ≤ 12 months                                            | 1.00 (Reference)                              | 1.00 (Reference)                                 |
| > 12 months                                            | 1.67 (1.41–1.97)                              | 1.31 (1.11–1.55)                                 |
| Without a follow-up examination                        |                                               |                                                  |
| FIT-negative                                           | 2.20 (2.01–2.42)                              | 1.68 (1.53–1.84)                                 |
| Never-screened                                         | 4.28 (4.01–4.56)                              | 1.82 (1.69–1.95)                                 |
| <b>Lead-time bias corrected from Cox hazards model</b> |                                               |                                                  |
| FIT-positive                                           |                                               |                                                  |
| With a follow-up examination                           |                                               |                                                  |
| ≤ 12 months                                            | 1.00 (Reference)                              | 1.00 (Reference)                                 |
| > 12 months                                            | 1.65 (1.39–1.95)                              | 1.32 (1.11–1.56)                                 |
| Without a follow-up examination                        |                                               |                                                  |
| FIT-negative                                           | 1.67 (1.53–1.84)                              | 1.30 (1.18–1.43)                                 |
| Never-screened                                         | 3.24 (3.04–3.46)                              | 1.42 (1.32–1.52)                                 |

Abbreviations: AJCC, The American Joint Committee on Cancer; FIT, fecal immunochemical test

<sup>a</sup> Simple Cox regression model

<sup>b</sup> Adjusted for colorectal cancer AJCC stage, colorectal cancer site, hospital levels, treatment, age at diagnosis, sex, and urbanization levels in the multiple Cox regression model
